# Supplementary material for: Tumor-polarized GPX3+ AT2 lung epithelial cells promote premetastatic niche formation
Source: PubMed Central journal article supplement — Proc Natl Acad Sci U S A. 2022 Aug 1;119(32):e2201899119. doi: 10.1073/pnas.2201899119 (PMC9371733; doi:10.1073/pnas.2201899119), 2022-08-01
Supplement: pnas.2201899119.sapp.pdf [file pnas.2201899119.sapp.pdf]

## **Supplementary Information for**

Tumor-polarized GPX3<sup>+</sup> AT2 lung epithelial cells promote pre-metastatic niche formation

Zixin Wang<sup>a,b</sup>, Jie Zhu<sup>a</sup>, Yanfang Liu<sup>a</sup>, Ziqiao Wang<sup>c</sup>, Xuetao Cao<sup>a,b,c</sup>, Yan Gu<sup>a,1</sup>

Corresponding: Yan Gu.

Email: [guyan@immunol.org](mailto:guyan@immunol.org)

**This PDF file includes:**

Figures S1 to S5

**A**

| Cluster | Cell Type                    | Cell number of tumor sample | Percentage 1 | Cell number of WT sample | Percentage 2 | Tumor vs WT (P1/P2) |
|---------|------------------------------|-----------------------------|--------------|--------------------------|--------------|---------------------|
| C0      | AT2                          | 1957                        | 22.9%        | 3110                     | 26.3%        | 0.87                |
| C1      | AT2                          | 2076                        | 24.3%        | 2347                     | 19.9%        | 1.22                |
| C2      | AT2                          | 923                         | 10.8%        | 1847                     | 15.6%        | 0.69                |
| C3      | AT2                          | 788                         | 9.2%         | 1604                     | 13.6%        | 0.68                |
| C4      | AT2                          | 270                         | 3.2%         | 1005                     | 8.5%         | 0.37                |
| C5      | Endothelial cell             | 853                         | 10.0%        | 150                      | 1.3%         | 7.85                |
| C6      | AT1                          | 307                         | 3.6%         | 626                      | 5.3%         | 0.68                |
| C7      | AT2                          | 607                         | 7.1%         | 288                      | 2.4%         | 2.91                |
| C8      | Ciliated cells               | 287                         | 3.4%         | 415                      | 3.5%         | 0.95                |
| C9      | Clara cells                  | 334                         | 3.9%         | 150                      | 1.3%         | 3.07                |
| C10     | AT2                          | 87                          | 1.0%         | 243                      | 2.1%         | 0.49                |
| C11     | Undefined                    | 40                          | 0.5%         | 12                       | 0.1%         | 4.60                |
| C12     | Alveolar bipotent progenitor | 21                          | 0.2%         | 7                        | 0.1%         | 4.14                |

**B**

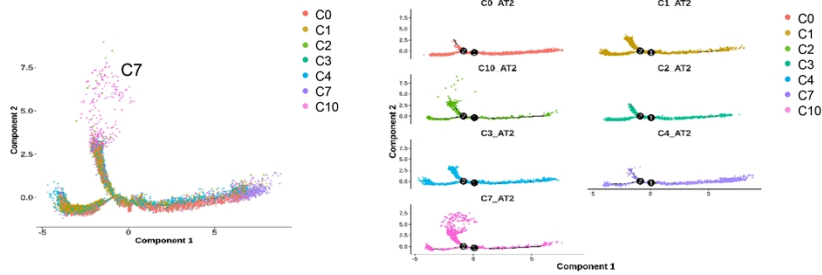

**C**

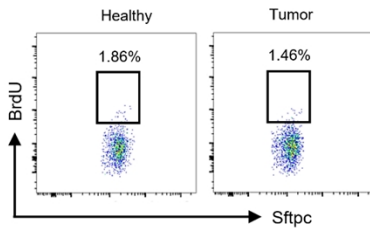

**D**

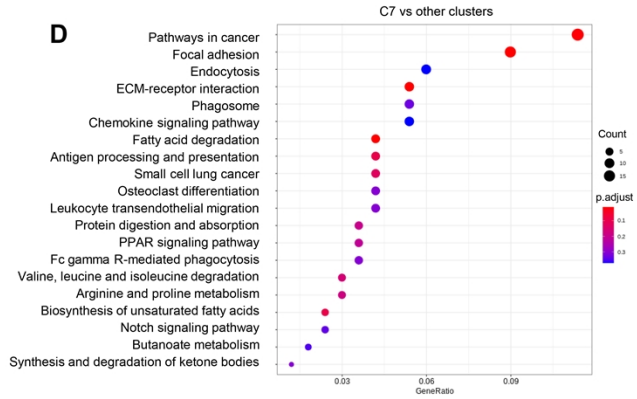

**E**

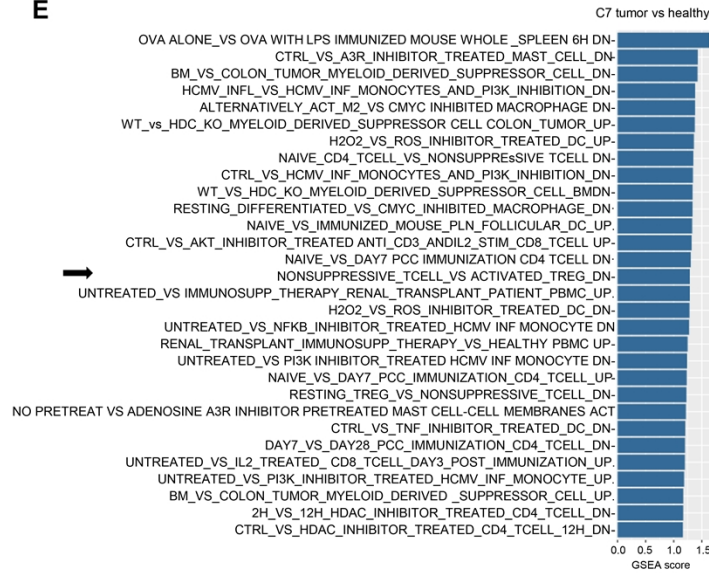

**Fig. S1. Characteristics of cluster seven of AT2 cells.** (A) Table of cell number and percentage of each cluster in lungs from LLC-bearing mouse and healthy one for scRNA-seq. (B) Pseudotime analysis of seven clusters in AT2 cells by Monocle 3. (C) Flow cytometry analysis of Sftpc<sup>+</sup> BrdU<sup>+</sup> AT2 cells in the lungs of tumor-bearing mice or healthy ones after 14-day feeding of BrdU. (D) KEGG analysis of related pathways of cluster seven cells verse other clusters from LLC tumor-bearing mice. (E) GSEA analysis of enriched pathways in cluster seven from LLC-bearing mouse vs healthy one from MSigDB (<http://software.broadinstitute.org/gsea/msigdb>).

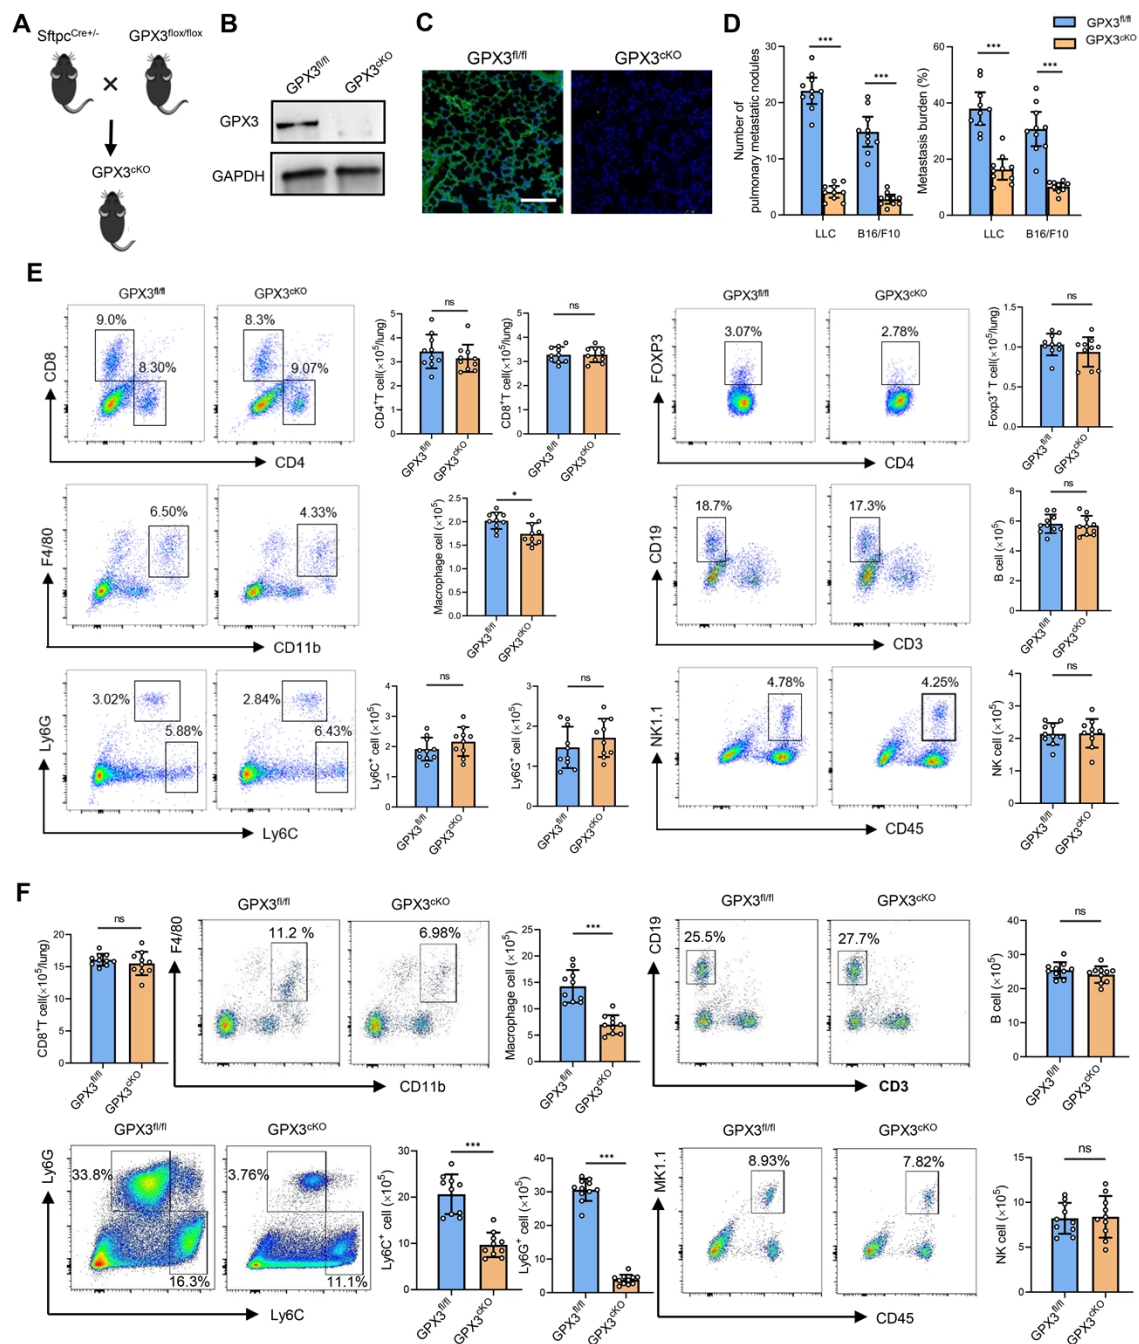

**Fig. S2. Immune cell subpopulations in the lungs of the mice with conditional knockout of GPX3 in AT2 cells.** (A) The schematic of experimental model of conditional knockout of GPX3 in AT2 cells by cross-breeding of GPX3<sup>fl/fl</sup> and AT2 cell-specific Sftpc<sup>cre</sup> mice. (B) Western blot analysis of GPX3 in the lung of GPX3<sup>fl/fl</sup> and GPX3<sup>ckO</sup> mice. GAPDH was used as a control. (C) Immunofluorescent analysis of GPX3 expression in the lung of GPX3<sup>fl/fl</sup> and GPX3<sup>ckO</sup> mice after LLC inoculation. Scale bar, 100 μm. (D) Quantitative analysis of pulmonary metastatic nodules and

metastasis burden of GPX3<sup>fl/fl</sup> or GPX3<sup>ckO</sup> mice. (E) Flow cytometric analysis of the proportions and absolute numbers of CD4<sup>+</sup> T, CD8<sup>+</sup> T cells, CD4<sup>+</sup> Foxp3<sup>+</sup> Treg cells, CD11b<sup>+</sup> F4/80<sup>+</sup> macrophages, CD3<sup>-</sup> CD19<sup>+</sup> B cells, Ly6C<sup>+</sup> Ly6G<sup>-</sup> monocytes, Ly6C<sup>int</sup> Ly6G<sup>+</sup> neutrophils and CD45<sup>+</sup> NK1.1<sup>+</sup> NK cells in the lung of GPX3<sup>fl/fl</sup> and GPX3<sup>ckO</sup> mice prior to tumor inoculation. (F) Flow cytometric analysis of proportions and absolute numbers of CD11b<sup>+</sup> F4/80<sup>+</sup> macrophages, CD3<sup>-</sup> CD19<sup>+</sup> B cells, Ly6C<sup>+</sup> Ly6G<sup>-</sup> monocytes, Ly6C<sup>int</sup> Ly6G<sup>+</sup> neutrophils and CD45<sup>+</sup> NK1.1<sup>+</sup> NK cells in the lung of GPX3<sup>fl/fl</sup> and GPX3<sup>ckO</sup> mice with LLC inoculation. Data are mean  $\pm$  s.d. of one representative experiment. Similar results were seen in two independent experiments. Unpaired Student's t-tests, \*, P <0.05; \*\*\*, P <0.001; ns, not significant.

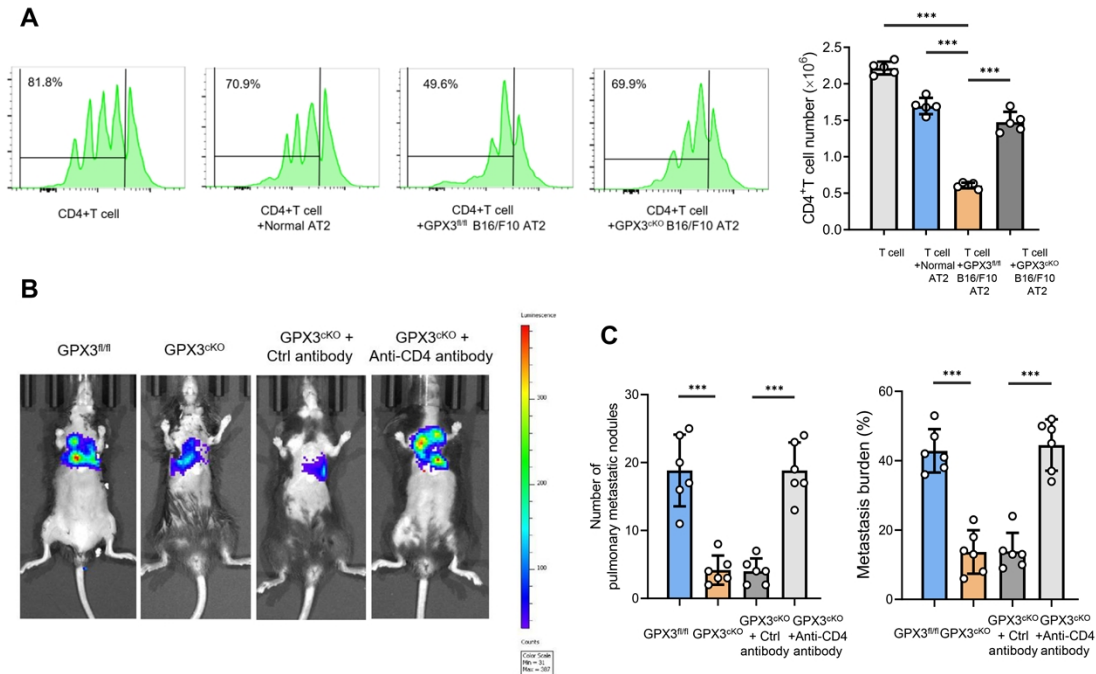

**Fig. S3. Inhibition of T cell function and metastasis of AT2 cells is dependent on GPX3 and CD4<sup>+</sup> T cells.** (A) Representative images of CFSE-based proliferation assay and cell number of CD4<sup>+</sup> T cells when co-cultured with AT2 cells derived from healthy, B16/F10-bearing GPX3<sup>fl/fl</sup> or GPX3<sup>cKO</sup> mice respectively. (B and C) Representative images (B) and quantitative analysis (C) of lung metastasis of GPX3<sup>fl/fl</sup> or GPX3<sup>cKO</sup> mice with or without anti-CD4 antibody treatment detected by luciferase-based bioluminescence imaging (n=6) 40 days after LLC inoculation. Data are mean  $\pm$  s.d. of one representative experiment. Similar results were seen in three independent experiments for A and in two independent experiments for B and C. Unpaired Student's t-tests, \*\*\*, P < 0.001.

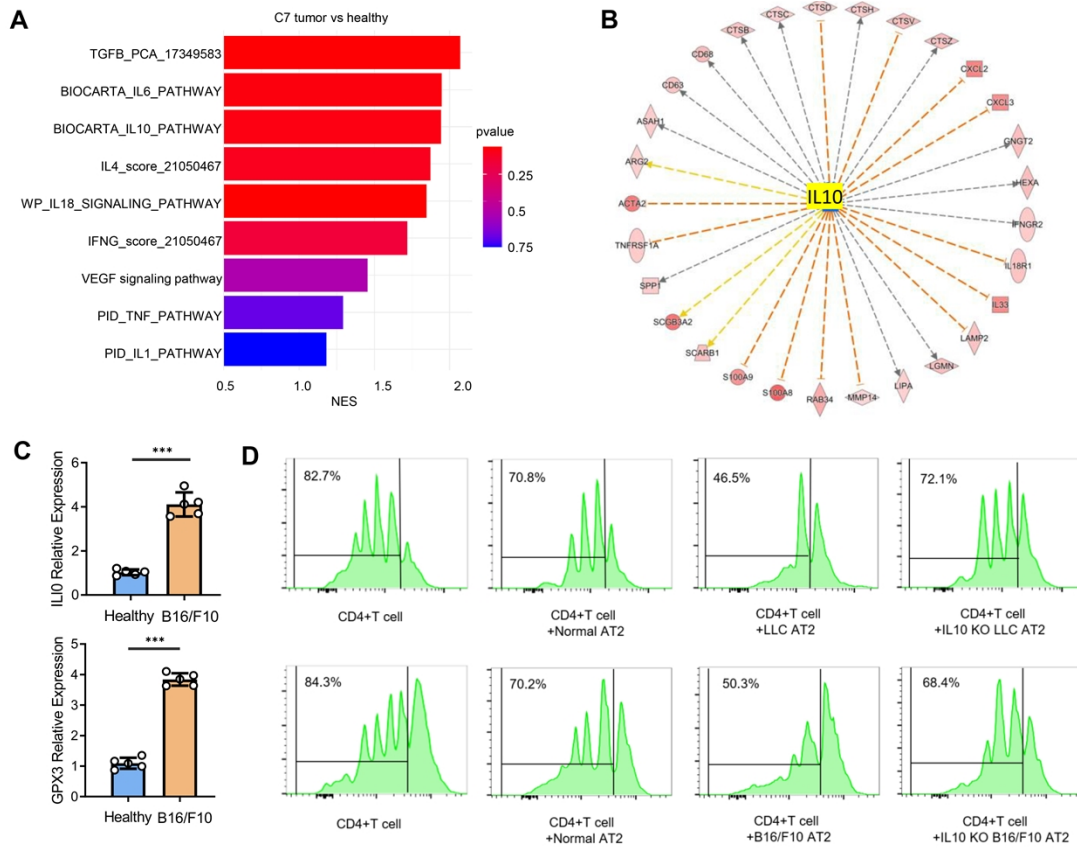

**Fig. S4. IL-10 is required for the inhibition of T cell function by GPX3<sup>+</sup> AT2 cells under tumor education.** (A) GSEA analysis of related pathways of cluster seven cells from LLC-bearing mouse versus healthy one in single-cell data. (B) Ingenuity Pathway Analysis (IPA) analysis of interacted genes with IL10 of cluster seven cells from LLC-bearing mouse versus healthy one in single-cell data. (C) qPCR analysis of IL-10 and GPX3 expression in AT2 cells from tumor mice or healthy ones 14 days after B16/F10 inoculation. (D) Representative images of CFSE-based proliferation assay of CD4<sup>+</sup> T cells when co-cultured with AT2 cells derived from healthy, LLC- and B16/F10-bearing WT, or IL10 KO mice respectively. Data are mean  $\pm$  s.d. of one representative experiment. Similar results were seen in three independent experiments. Unpaired Student's t-tests, \*\*\*,  $P < 0.001$ . KO, knockout.

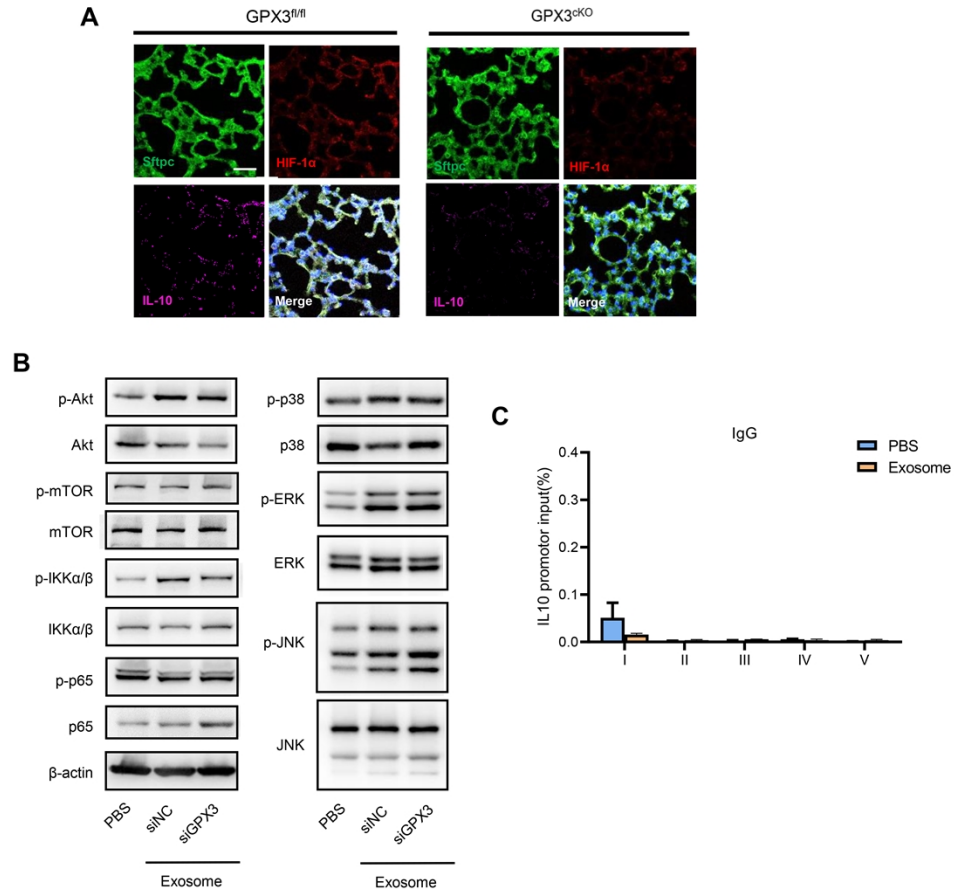

**Fig. S5. Related signal pathways in tumor exosome-treated MLE-12 cells.** (A) Immunofluorescent analysis of Sftpc, IL10 and HIF-1 $\alpha$  expression in the lungs of GPX3<sup>fl/fl</sup> or GPX3<sup>cKO</sup> mice after LLC inoculation. Scale bar, 100  $\mu$ m. (B) Protein level and phosphorylation of Akt, IKK $\alpha$ / $\beta$ , mTOR, p65, p38, ERK and JNK in MLE-12 stimulated with tumoral exosomes were detected by Western blot.  $\beta$ -actin was used as control. (C) CHIP analysis of HIF-1 $\alpha$  binding site with IL-10 promoter after tumor exosome administration. IgG was used as control.
